# Supplementary material
Source: publisher figshare collection journal article supplement (https://frontiersin.figshare.com/ndownloader/files/31782974)
Supplement: Supplementary file [file 31782974]

Color Key

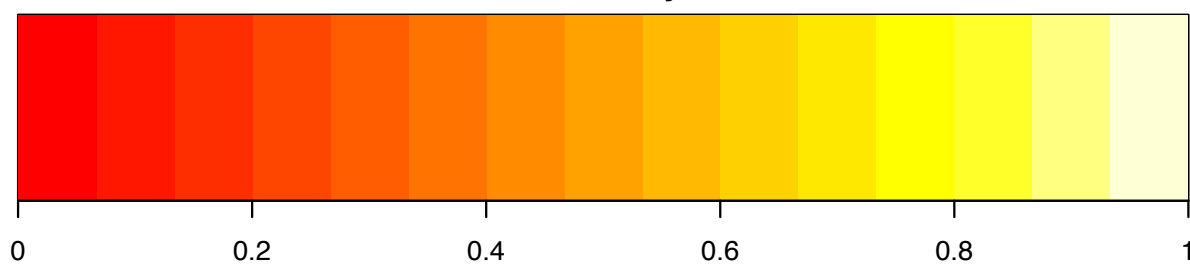

HOP

IBS-1000G

HOP

IBS-1000G

P1\_SALIVA

P1\_BLOOD

P1\_BONE

P2\_SALIVA

P2\_BLOOD

HG01694

HG01785

HG01768

HG01669

HG01705

HG01762

HG01678

HG01773

HG01527

HG02224

P1\_SALIVA

P1\_BLOOD

P1\_BONE

P2\_SALIVA

P2\_BLOOD

HG01694

HG01785

HG01768

HG01669

HG01705

HG01762

HG01678

HG01773

HG01527

HG02224
